# Supplementary material for: The efficiency of cardiovascular risk assessment: do the right patients get statin treatment?
Source: HighWire-hosted journal article supplement (doi:10.1136/heartjnl-2013-303698), 2013-06-04
Supplement: heartjnl-2013-303698supp_table.pdf [file heartjnl-2013-303698supp_table.pdf]

Supplementary data

Appendix Table 1: Risk factors used by Framingham, ASSIGN and QRISK2 risk scores

| Risk factor                                       | Framingham risk score | ASSIGN risk score | QRISK2 risk score |
|---------------------------------------------------|-----------------------|-------------------|-------------------|
| Age                                               | +                     | +                 | +                 |
| Gender                                            | +                     | +                 | +                 |
| Ethnicity <sup>&amp;</sup>                        | + <sup>#</sup>        |                   | +                 |
| Index of multiple deprivation*<br>Townsend score* |                       | +                 | +                 |
| Body mass index (BMI)                             |                       |                   | +                 |
| Smoking status                                    | +                     | +                 | +                 |
| Number of cigarettes / day                        |                       | +                 |                   |
| Systolic blood pressure                           | +                     | +                 | +                 |
| Ratio of cholesterol over HDL                     | +                     | +                 | +                 |
| Family history of CVD                             |                       | +                 | +                 |
| Left ventricular hypertrophy                      | +                     |                   |                   |
| Treated hypertension                              |                       |                   | +                 |
| Rheumatoid arthritis                              |                       |                   | +                 |
| Chronic renal disease                             |                       |                   | +                 |
| Atrial fibrillation                               |                       |                   | +                 |

<sup>#</sup>The Framingham predicted risks were adjusted by 1.4 for South Asians as recommended by NICE.<sup>13</sup>

<sup>&</sup>Information on ethnicity was initially derived from the GP records in CPRD. If not available, HES (that records ethnicity independently) was used to classify ethnicity. A category of missing ethnicity was included into the regression models.

\*Socioeconomic status was available through the Index of Multiple Deprivation (IMD) and Townsend score based on the postcode of the patient's residence. The ASSIGN score is based on the IMD for Scotland and scores do not have similar values across the four countries of the UK. We standardised English IMD scores to those of Scotland by assigning similar values to the percentiles in each country.
